# Supplementary material for: Bioresponsive Gelatin-Hyaluronic Acid Hydrogels for 3D Bioprinting
Source: Preprints.org preprint supplement (doi:10.20944/preprints202306.2020.v1), 2023-06-29
Supplement: Supplementary file 1 [file supplementary]

**Bioresponsive gelatin-hyaluronic acid hydrogels for 3D bioprinting**

Mst Rita Khatun1, Amitava Bhattacharyya1,2,3, Maral Gunbayar1, Minsik Jung1, Insup Noh1,3*

1Department of Chemical and Biomolecular Engineering, Seoul National University of Science and Technology, Seoul 01811, Republic of Korea

2Functional, Innovative and Smart Textiles, PSG Institute of Advanced Studies, Coimbatore 641004, India

3Convergence Institute of Biomedical Engineering and Biomaterials, Seoul National University of Science and Technology, Seoul 01811, Republic of Korea

***Correspondence:[insup@seoultech.ac.kr](mailto:insup@seoultech.ac.kr)

Scheduled to be submitted to *gels.*

June 2023


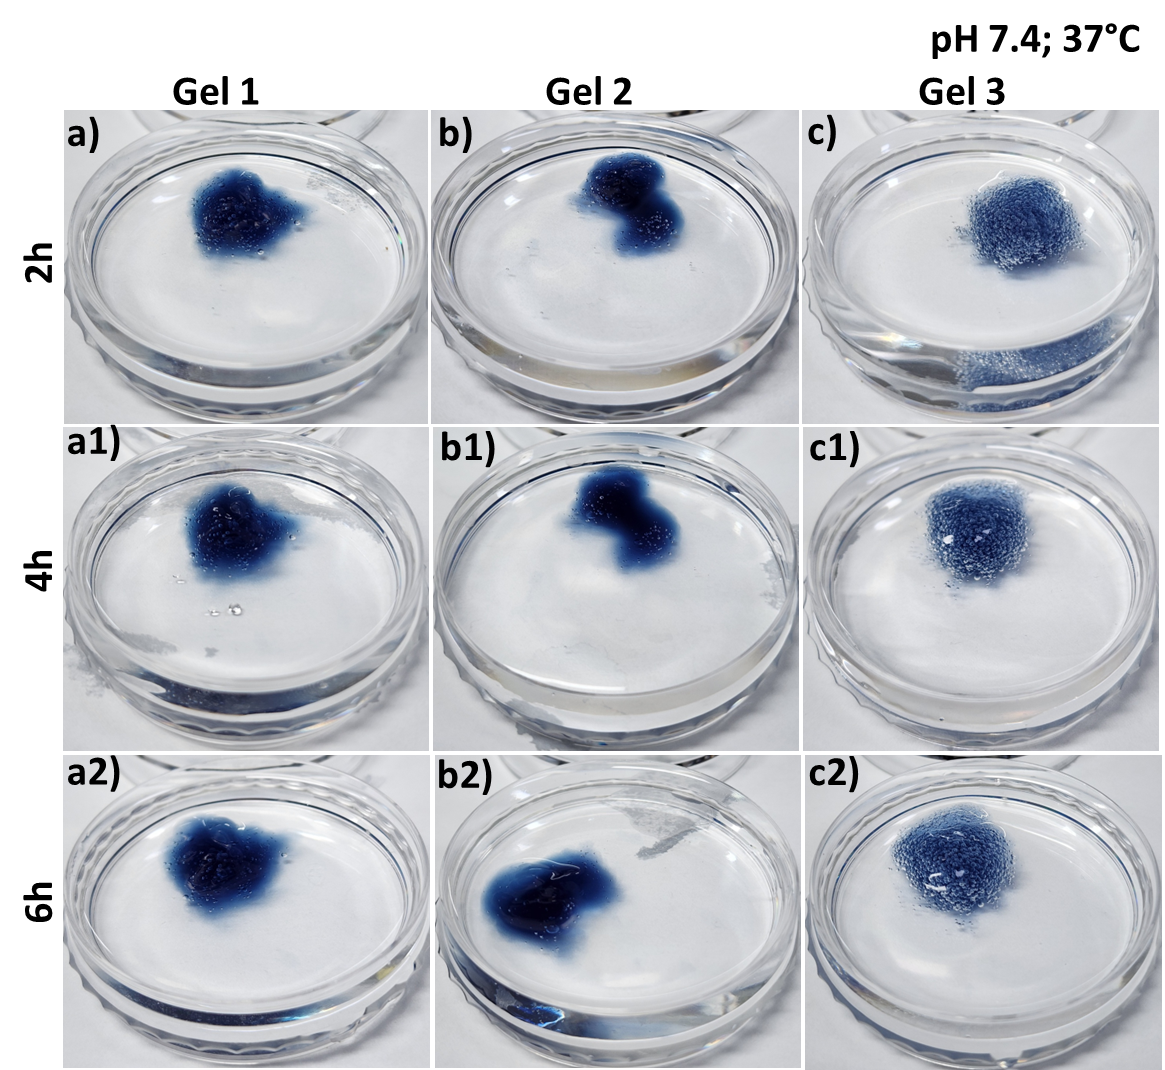


Supporting Figure 1. Swelling of different gelatin-HA hydrogel at 37°C in pH 7.4 phosphate buffer solution (PBS).


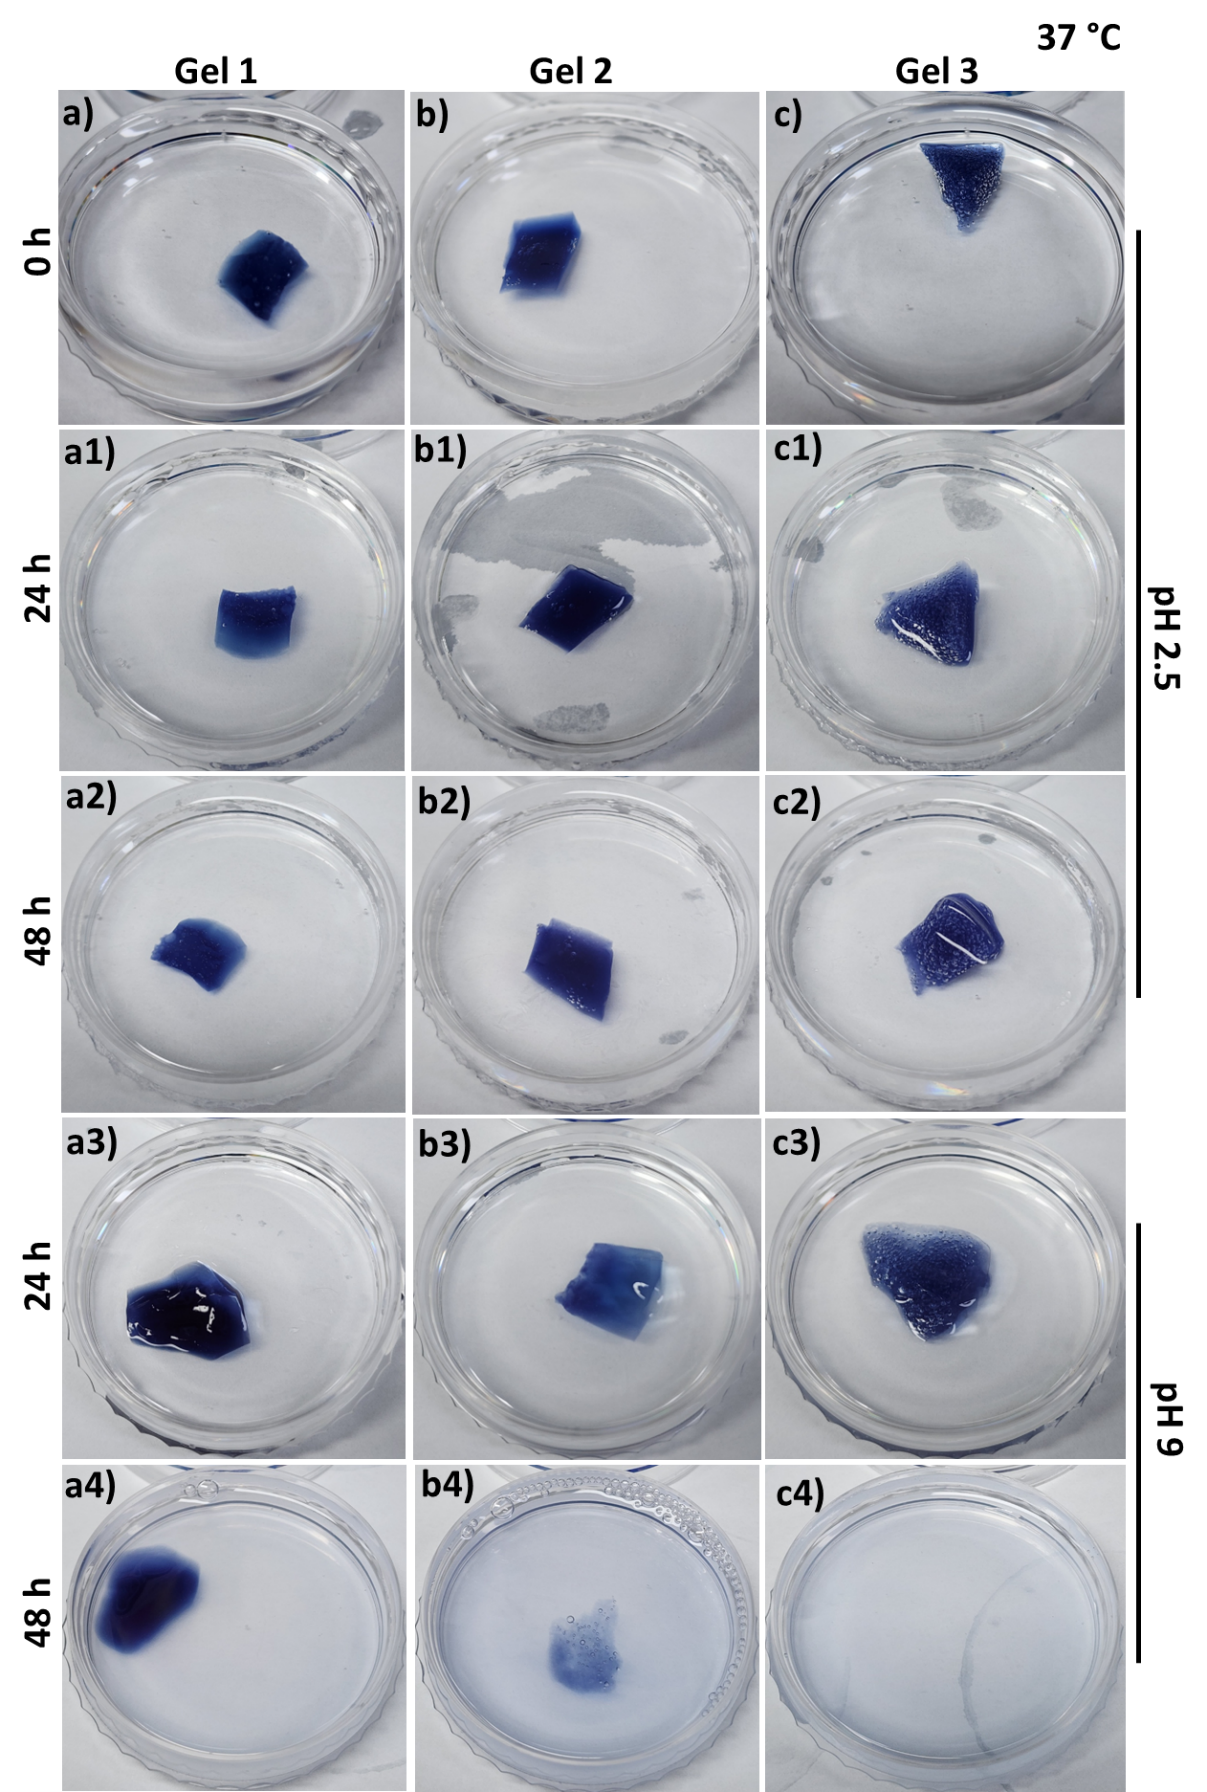


Supporting Figure 2. Degradation study of different gelatin-HA hydrogels at pH 2.5 and pH 9 PBS in 37°C for 48 hours.


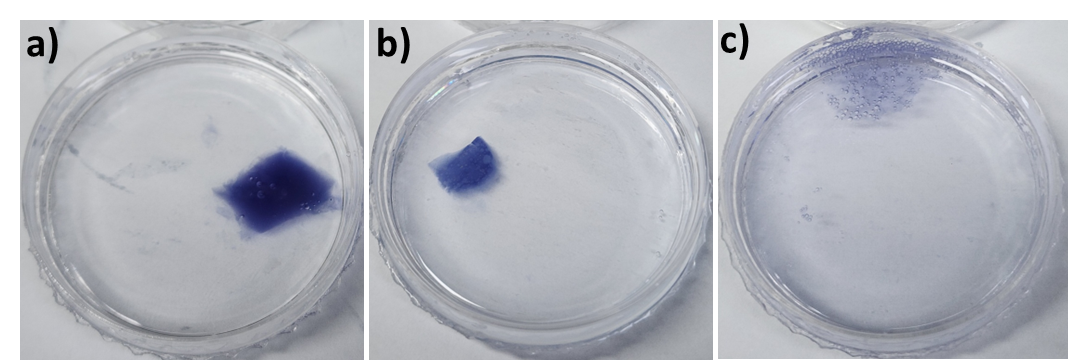


Supporting Figure 3. Degradation study of different gelatin-HA hydrogels at 37°C and pH 2.5 in PBS after 5 days, where (a) Gel 1; (b) Gel 2; (c) Gel 3.


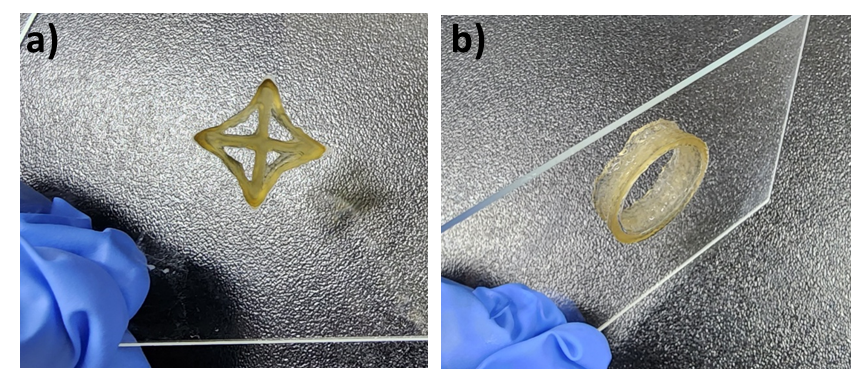


Supporting Figure 4. Adhesiveness test of the printed gelatin-HA gel scaffolds by inverting the glass substrate, where (a) star, (b) tube.
